# Supplementary material for: Quantification and isolation of Bacillus subtilis spores using cell sorting and automated gating
Source: PubMed Central journal article supplement (PMC6663000; doi:10.1371/journal.pone.0219892), 2019-07-29
Supplement: pone.0219892.s001.pdf [file pone.0219892.s001.pdf]

**S1 Table. Oligos employed in the present study**

| Oligo number | Oligo name                | Sequence (5'-3')                                                         |
|--------------|---------------------------|--------------------------------------------------------------------------|
| 02024        | <i>cwlD</i> _front_fw     | AGATCTTCCGGATGGCT<br>CGAGTTTTTCAGCAAGA<br>TCTTCATTTGGGCGAATT<br>TCC      |
| 02025        | <i>cwlD</i> _front_rv     | TACGAACGGTAGGCCTC<br>GAGGATCCAATTCGTGA<br>TTACCGCATGCGAAGCT<br>TAC       |
| 02026        | <i>cwlD</i> _back_fw      | CTCTAGATGAATTGGTG<br>AAGCGCTGATCAGAAAA<br>AGGAGACCCTCCGGAGT<br>AATG      |
| 02027        | <i>cwlD</i> _back_rv      | AGCTGAGAATATTGTAG<br>GAGATCTTCTAGAAAGA<br>TCCGCATCAATTAACC<br>AACC       |
| 02012        | <i>sleB</i> _front_fw     | AGATCTTCCGGATGGCT<br>CGAGTTTTTCAGCAAGA<br>TCTGCACACAAAAAGC<br>CGC        |
| 02023        | <i>sleB</i> _front_rv     | TACGAACGGTAGGCCTC<br>GAGGATCCAATTCGTGA<br>TCTTCGGGGTTTTTGGA<br>GG        |
| 02014        | <i>sleB</i> _back_fw      | CGGTAGGCCTCTAGATG<br>AATTGGTGAAGCGCTGA<br>TCATTTCCCGGCTGAATT<br>TGC      |
| 02022        | <i>sleB</i> _back_rv      | AGCTGAGAATATTGTAG<br>GAGATCTTCTAGAAAGA<br>TGCAGAACCTATATATAA<br>AGACC    |
| 02039        | <i>spoIIIGA</i> _front_fw | AGATCTTCCGGATGGCT<br>CGAGTTTTTCAGCAAGA<br>TCCTATTGCTTCCTTCGC<br>TTAG     |
| 02040        | <i>spoIIIGA</i> _front_rv | TACGAACGGTAGGCCTC<br>GAGGATCCAATTCGTGA<br>TCGAGGAAGTATAATGA<br>GAGGATATA |

|       |                              |                                                                         |
|-------|------------------------------|-------------------------------------------------------------------------|
| 02089 | <i>cotA_fm_OH_fw</i>         | AGATCTTCCGGATGGCT<br>CGAGTTTTTCAGCAAGA<br>TCCATGTTTCATCTGTTCT<br>TTTTGG |
| 02090 | <i>cotA_fm_OH_rv</i>         | TACGAACGGTAGGCCTC<br>GAGGATCCAATTCGTGA<br>TCCTCTAGCAGGCAAGT<br>TTTTTC   |
| 02091 | <i>cotA_back_OH_fw</i>       | CGGTAGGCCTCTAGATG<br>AATTGGTGAAGCGCTGA<br>TACAAAATCCTAAACGG<br>CAGG     |
| 02092 | <i>cotA_back_OH_rv</i>       | AGCTGAGAATATTGTAG<br>GAGATCTTCTAGAAAGA<br>TTTGCAGAAAGAAATGA<br>AGCG     |
| 02158 | <i>spo0E_front_fw</i>        | AGATCTTCCGGATGGCT<br>CGAGTTTTTCAGCAAGA<br>TCCACTTTTCATATTGTG<br>ACAGTTC |
| 02159 | <i>spo0E_front_rv</i>        | TACGAACGGTAGGCCTC<br>GAGGATCCAATTCGTGA<br>TGCTAAGAAATAGGAAA<br>CAAGTTTG |
| 02160 | <i>spo0E_back_fw</i>         | CGGTAGGCCTCTAGATG<br>AATTGGTGAAGCGCTGA<br>TATAAAGAGAGAGCTTT<br>TCGGAAG  |
| 02161 | <i>spo0E_back_rv</i>         | AGCTGAGAATATTGTAG<br>GAGATCTTCTAGAAAGA<br>TGCATTGCCATTCGATTT<br>GC      |
| 02047 | <i>cotB_front_pJET_OH_fw</i> | AGATCTTCCGGATGGCT<br>CGAGTTTTTCAGCAAGA<br>TAGCTCAGTTTAAGTCA<br>GAAGTG   |
| 02062 | <i>cotB_front_SSS_OH_rv</i>  | TACGAACGGTAGGCCTC<br>GAGGATCCAATTCGTGA<br>TCGCGAATACCCATTTTC<br>ACG     |
| 02049 | <i>cotB_back_SSS_OH_fw</i>   | CGGTAGGCCTCTAGATG<br>AATTGGTGAAGCGCTGA<br>TGGAGGAGCATCAGATA             |

|       |                             |                                                                                  |
|-------|-----------------------------|----------------------------------------------------------------------------------|
|       |                             | AAGTG                                                                            |
| 02050 | <i>cotB_back_pJET_OH_rv</i> | AGCTGAGAATATTGTAG<br>GAGATCTTCTAGAAAGA<br>TGTATACGGTGTTTGTTC<br>AGTTG            |
| 02124 | <i>PcotYZ_pksx_OH_fw</i>    | TTATAAAAATTGCCCTCT<br>CATTFFFFFFCTTGTTACC<br>CAAGCATATGATGAATAT<br>ATAGACG       |
| 02171 | <i>PcotYZ_cotB_rv</i>       | ATTTTCATTATTTGAATGA<br>TATTTTCATTCTCCTCTTG<br>CTCATTGATTTTCAGCTCC<br>TTCTTTATAGG |
| 02173 | <i>cotB_OH_Pcoty_fw</i>     | AAGTCAAATACCCTATA<br>AAGAAGGAGCTGAAAT<br>CAATGAGCAAGAGGAG<br>AATGAAATATC         |
| 02172 | <i>cotB_OH_linker_rv</i>    | ACTTCCACCACCTCCAC<br>CACTTCCACCACCTCCA<br>CCAAATTTACGTTTCCA<br>GTGATAGTC         |
| 02066 | <i>sfGFP_linker_OH_fw</i>   | GGTGGAGGTGGTGGAA<br>GTGGTGGAGGTGGTGG<br>AAGTATGCGTAAAGGCG<br>AAGAG               |
| 02067 | <i>sfGFP_lox71_OH_rv</i>    | AATAACTTCGTATAATGT<br>ATGCTATACGAACGGTAT<br>CATTGTACAGTTCATCC<br>ATACC           |
| 14089 | Spec-mid-fw                 | CAATAGCCAAATCAGGA<br>TCATAGC                                                     |
| 14090 | Spec-mid-rv                 | GGACAAATTCAGGAACC<br>AAGC                                                        |
| 14249 | SSS-l71_fw                  | ATCACGAATTGGATCCT<br>CGAG                                                        |
| 14250 | SSS-l66_rv                  | ATCAGCGCTTCACCAAT<br>TCATC                                                       |
| 23043 | pJetFor                     | ATCTTGCTGAAAACTC<br>GAGC                                                         |
| 23044 | pJetRev                     | ATCTTTCTAGAAGATCTC<br>C                                                          |

|       |          |                                                                             |
|-------|----------|-----------------------------------------------------------------------------|
| 11290 | front_rv | CCGATAACTTCGTATAAT<br>GTATGCTATACGAACGGT<br>AGGAGCTCACCCCTAAT<br>TTCC       |
| 11291 | front_fw | GAAAGGAGGAAGCGGA<br>AGAATGAAGTAAGAGG<br>GCGTAAACCTGAACATC<br>CGCG           |
| 11403 | back_fw  | GGCATAACTTCGTATAGC<br>ATACATTATACGAACGGT<br>AGGTTGAATATTATGATG<br>AAACGGTCC |
| 11404 | back_rv  | GGATTGGAGGAGTATGG<br>CCACTAATACTAAGTTCA<br>GCGTATCCATAACCTGCC<br>CGATC      |
