# Supplementary material for: Quantification and isolation of Bacillus subtilis spores using cell sorting and automated gating
Source: PubMed Central journal article supplement (PMC6663000; doi:10.1371/journal.pone.0219892), 2019-07-29
Supplement: pone.0219892.s002.pdf [file pone.0219892.s002.pdf]

**S2 Table. Plasmids employed in the present study**

| Plasmid  | Backbone | Integration site    | Resistance | Reference                               |
|----------|----------|---------------------|------------|-----------------------------------------|
| p02002   | pJET     | <i>cwlD</i>         | spec       | This study                              |
| p02004   | pJET     | <i>spoIIGA/sigE</i> | spec       | This study                              |
| p02005   | pJET     | <i>sleB</i>         | spec       | This study                              |
| p02006   | pJET     | <i>cotB</i>         | spec       | This study                              |
| p02013   | pJET     | <i>cotA</i>         | spec       | This study                              |
| p02023   | pJET     | <i>spo0E</i>        | spec       | This study                              |
| p02030   | pJK179   | <i>pksX</i>         | spec       | This study                              |
| p11083.2 | pJET     | <i>skfA</i>         | spec       | PhD thesis of<br>Silke<br>Hackenschmidt |
